# Supplementary material
Source: HighWire-hosted journal article supplement (https://jnm.snmjournals.org/highwire/filestream/94395/field_highwire_adjunct_files/0/103168_Supplemental_Data.pdf)
Supplement: 103168_Supplemental_Data.pdf [file 103168_Supplemental_Data.pdf]

## Physiological Tissue Characterization

The vascular and interstitial volumes of LuCaP 77 tumor explants and normal tissues in SCID mice were measured in vivo by the indirect method for  $^{99m}\text{Tc}$  red blood cell labeling (*Mol Pharmaceutics*. 2010;7:1848-1857) and jugular cannula infusion of the extracellular marker  $^{111}\text{In}$ -pentetate, respectively, as previously described (*PLoS One*. 2011;6:e17874).

**SUPPLEMENTAL TABLE 1:** Physiological Tissue Characterization of LuCaP 77 Tumor Explants and Normal SCID Mouse Tissues

| Tissue          | Vascular volume<br>( $\mu\text{L/g}$ tissue) |                         | Interstitial volume<br>( $\mu\text{L/g}$ tissue) |                         |
|-----------------|----------------------------------------------|-------------------------|--------------------------------------------------|-------------------------|
|                 | Measured<br>(n=5)                            | Literature <sup>*</sup> | Measured<br>(n=5)                                | Literature <sup>*</sup> |
| LuCaP 77 tumor  | $13 \pm 7$                                   | n/a                     | $277 \pm 47$                                     | n/a                     |
| liver           | $50 \pm 16$                                  | $42 \pm 8$              | $92 \pm 25$                                      | $90 \pm 15$             |
| kidney          | $100 \pm 32$                                 | $77 \pm 7$              | $1516 \pm 231$ <sup>†</sup>                      | $2202 \pm 462$          |
| large intestine | $12 \pm 5$                                   | n/a                     | $150 \pm 21$                                     | n/a                     |
| small intestine | $8 \pm 5$                                    | $8 \pm 2$               | $157 \pm 48$                                     | $121 \pm 62$            |
| heart           | $35 \pm 24$                                  | $30 \pm 7$              | $150 \pm 20$                                     | $158 \pm 67$            |
| lungs           | $178 \pm 109$                                | $235 \pm 111$           | $179 \pm 32$                                     | $173 \pm 71$            |
| muscle          | $7 \pm 4$                                    | $9 \pm 2$               | $55 \pm 18$                                      | $114 \pm 119$           |

\* Literature values for normal murine tissues are reprinted with permission from a literature reference (24) for comparison. Note that measured and literature values correspond to SCID and nude mice, respectively.

† The measured value for renal interstitial volume is not physiologically accurate, since the kidney is a clearance organ for <sup>111</sup>In-pentetate, the probe used to measure extracellular space.
